# Supplementary material
Source: publisher figshare collection journal article supplement (https://acs.figshare.com/ndownloader/files/4693060)
Supplement: Supplementary file 1 [file 4693060]

## SUPPORTING INFORMATION

### **Radical Salt-Doped Hole Transporters In Organic Photovoltaic Devices**

SanthiSagar Vaddiraju<sup>†</sup>, Mathew Mathai<sup>†</sup>, Emmanuel Kymakis<sup>‡</sup>, Fotios

Papadimitrakopoulos<sup>†,£,\*</sup>

<sup>†</sup> Nanomaterials Optoelectronics Laboratory, Polymer Program, Institute of Materials Science, University of Connecticut, Storrs, Connecticut 06269-3136, USA

<sup>‡</sup> Technological Educational Institute (T.E.I) of Crete, Electrical Engineering Department School of Applied Technology, Crete, Greece.

<sup>£</sup> Department of Chemistry, University of Connecticut, Storrs, Connecticut 06269-3136, USA

---

\*To whom correspondence should be addressed.

Tel.: +1 860 486 3447; fax: +1 860 486 4745.

E-mail Address: [papadim@mail.ims.uconn.edu](mailto:papadim@mail.ims.uconn.edu) (F.Papadimitrakopoulos)

### X-Ray Diffraction on PTPD, PTPD/Salt binary and PTPD/Salt/C<sub>60</sub> ternary blends:

X-ray diffraction was used to confirm the morphology of the PTPD films in the presence (10 wt%) and absence of  $\text{TMTPD}^+ \text{SbF}_6^-$  radical salt (Figure S1). The PTPD polymer film appears amorphous as evident from the absence of any sharp crystalline peaks in the XRD micrographs. The PTPD/salt binary blend also remains amorphous after the addition of the crystalline small molecule salt.

The XRD micrograph of the film of PTPD/salt/C<sub>60</sub> ternary blends with 10 wt% and 50 wt% in salt and C<sub>60</sub> respectively with respect to PTPD is shown in Figure S2. While the PTPD/salt binary blend shows more of an amorphous nature, the PTPD/salt/C<sub>60</sub> ternary blend shows crystalline features which correspond to C<sub>60</sub>.<sup>1, 2</sup> This suggest that during spin coating the C<sub>60</sub> readily crystallize out from the amorphous PTPD/salt matrix.

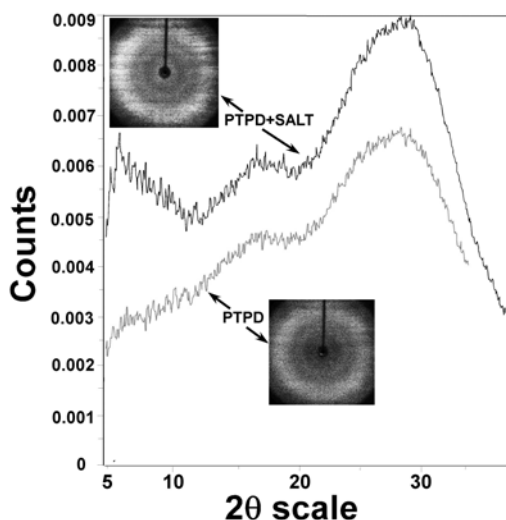

**Figure S1:** X-ray diffraction data of PTPD polymer and the PTPD/salt binary blend.

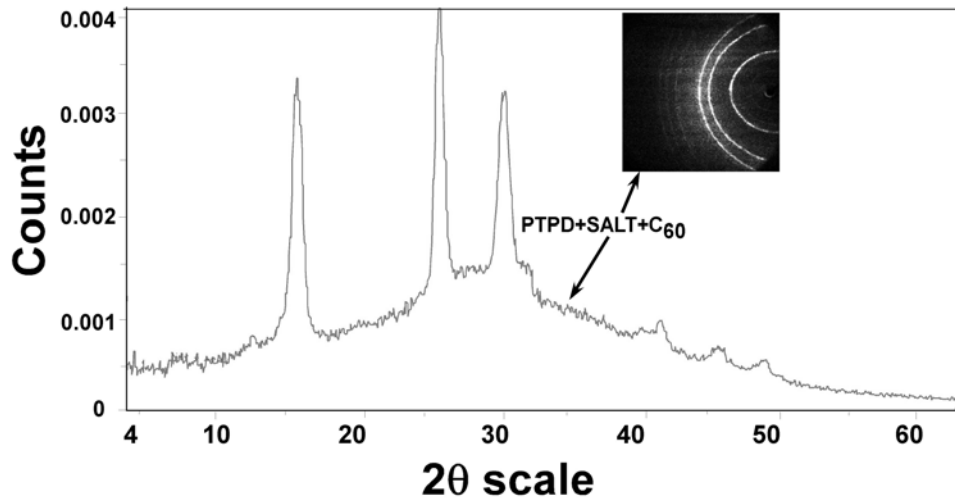

**Figure S2:** X-ray diffraction of PTPD/salt/C<sub>60</sub> ternary blend. The salt and C<sub>60</sub> in the ternary blend were 10 wt% and 50 wt%, respectively with respect to the PTPD polymer.

#### **Dark *J-V* Characteristics of ITO/PTPD-Salt/Al Binary Blend and ITO/PTPD-Salt-C<sub>60</sub>/Al Ternary Blend Devices:**

Figure S3 shows the *J-V* characteristics under no illumination of the ITO/PTPD-salt/Al binary mixture devices for various salt concentrations in PTPD. Even though the devices exhibited no photovoltaic behavior, current densities increased with increasing salt concentration because of increased *p*-type conductivity of the PTPD films. Figure S4 shows the *J-V* characteristics under no illumination of the ITO/PTPD-salt-C<sub>60</sub>/Al ternary mixture devices for various salt concentrations in PTPD. Similar to the ITO/PTPD-salt/Al binary blend devices, the devices exhibited no photovoltaic behavior but the current densities increased with increasing salt concentration.

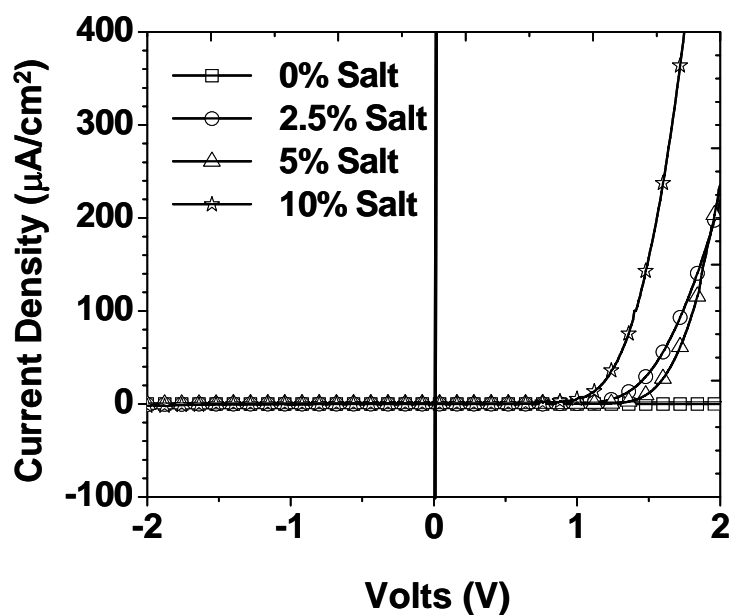

**Figure S3:** *J-V* characteristics under no illumination of the ITO/PTPD-salt/Al binary blend devices with varying salt concentrations.

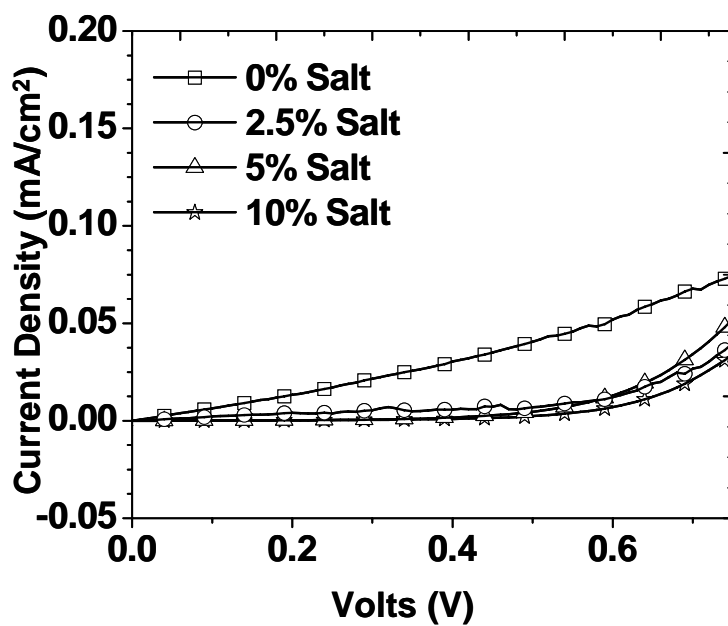

**Figure S4:** *J-V* characteristics under no illumination of the ITO/PTPD-salt-C<sub>60</sub>/Al ternary blend devices with varying salt concentration.

**Comparison of percent increase in absorption and short circuit current density as a function of salt concentration:**

Figure S5 shows the percentage increase in absorption and  $I_{sc}$  as function of the salt concentration. As explained in the manuscript, while the increase in salt concentration increases the absorption of the device linearly by c.a. 70% from that of the 0% salt device, the progressive increase in  $I_{sc}$  is much higher (c.a. 150%). The latter has been explained by the progressive decrease in series resistance for  $p$  type conduction through the PTPD/salt phase.

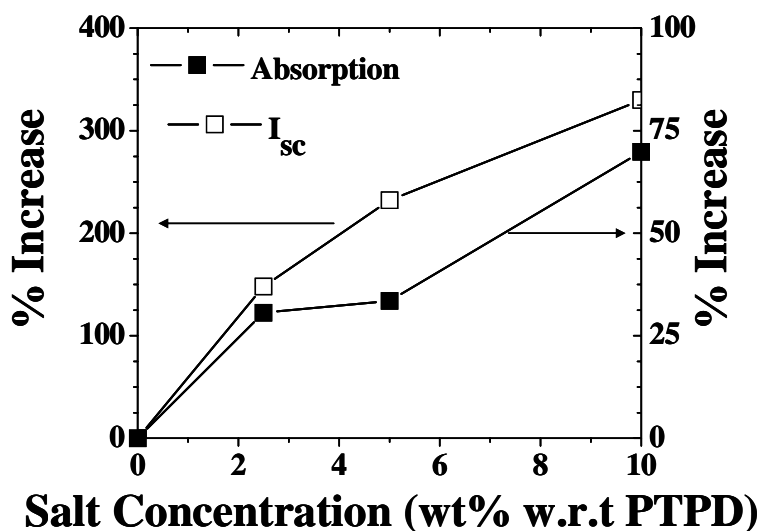

**Figure S5:** Percentage increase in absorption and  $I_{sc}$  as function of the salt concentration in PTPD/salt binary blend devices.

**References:**

1. Kutner, W.; Pieta, P.; Nowakowski, R.; J. Sobczak; Kaszkur, Z.; McCarty, A. L.; D'Souza, F.; *Chem. Mater.* **2005**, *17*, 5635.
2. Tomura, K.; Nishizawa, M.; Takemura, D.; Matsue, T.; Uchida, I.; *Chem. Lett.* **1994**, *23*, 1365.
